# Supplementary material
Source: PubMed Central journal article supplement (PMC4151043)
Supplement: NIHMS589556-supplement-1.pdf [file NIHMS589556-supplement-1.pdf]

## **Online Resource 1**

### **Residential Integration on the New Frontier: Immigrant Segregation in Established and New Destinations**

Matthew Hall

**Table S1** Group-specific destination types in top-100 MSAs

| Metropolitan Name                          | Chinese | Filipinos | Indians | Vietnamese | Koreans | Mexicans | Salvadorans | Dominicans | Jamaicans | Haitians |
|--------------------------------------------|---------|-----------|---------|------------|---------|----------|-------------|------------|-----------|----------|
| Akron, OH                                  | New     | --        | Minor   | --         | --      | --       | --          | --         | --        | --       |
| Albany-Schenectady-Troy, NY                | Minor   | --        | New     | --         | New     | --       | --          | --         | Minor     | --       |
| Albuquerque, NM                            | New     | Minor     | --      | Estab.     | --      | New      | --          | --         | --        | --       |
| Allentown-Bethlehem-Easton, PA             | New     | --        | Minor   | Minor      | New     | Minor    | --          | New        | --        | --       |
| Ann Arbor, MI                              | New     | --        | New     | --         | New     | Minor    | --          | --         | --        | --       |
| Atlanta, GA                                | Minor   | New       | Estab.  | New        | New     | New      | Minor       | New        | New       | Minor    |
| Austin-San Marcos, TX                      | Minor   | Minor     | New     | Estab.     | Minor   | New      | New         | --         | --        | --       |
| Bakersfield, CA                            | --      | New       | New     | --         | --      | New      | New         | --         | --        | --       |
| Baltimore, MD                              | Minor   | Minor     | Estab.  | Minor      | Estab.  | Minor    | Minor       | --         | New       | --       |
| Baton Rouge, LA                            | New     | --        | Minor   | New        | --      | New      | --          | --         | --        | --       |
| Bergen-Passaic, NJ                         | New     | New       | New     | --         | Estab.  | New      | New         | New        | Estab.    | --       |
| Birmingham, AL                             | New     | --        | Minor   | --         | --      | Minor    | --          | --         | --        | --       |
| Boston, MA-NH                              | Estab.  | Minor     | Estab.  | New        | Minor   | New      | New         | New        | Estab.    | Estab.   |
| Buffalo-Niagara Falls, NY                  | Minor   | --        | Minor   | New        | Minor   | --       | --          | --         | --        | --       |
| Charleston-North Charleston, SC            | --      | New       | --      | --         | --      | New      | --          | --         | --        | --       |
| Charlotte-Gastonia, NC-SC <sup>a</sup>     | New     | Minor     | Minor   | Minor      | New     | New      | New         | --         | --        | --       |
| Chicago, IL                                | New     | Estab.    | Estab.  | Minor      | Estab.  | Estab.   | Minor       | Minor      | Minor     | Estab.   |
| Cincinnati, OH-KY-IN                       | New     | Minor     | Minor   | New        | Minor   | Minor    | --          | --         | --        | --       |
| Cleveland-Lorain-Elyria, OH                | Minor   | Minor     | Estab.  | Minor      | Minor   | Minor    | --          | --         | Minor     | --       |
| Columbia, SC                               | Minor   | --        | Minor   | --         | Minor   | New      | --          | --         | --        | --       |
| Columbus, OH                               | New     | Minor     | New     | New        | Minor   | New      | --          | --         | --        | --       |
| Dallas, TX                                 | Minor   | Minor     | Estab.  | New        | New     | Estab.   | New         | --         | Minor     | --       |
| Dayton-Springfield, OH                     | Minor   | --        | Minor   | Estab.     | New     | Minor    | --          | --         | --        | --       |
| Denver, CO                                 | Minor   | Minor     | Minor   | New        | New     | New      | Minor       | --         | --        | --       |
| Detroit, MI                                | Minor   | Minor     | Estab.  | New        | Minor   | Minor    | --          | --         | Minor     | --       |
| El Paso, TX                                | --      | Minor     | --      | --         | Minor   | Estab.   | --          | --         | --        | --       |
| Fort Lauderdale, FL                        | Minor   | Minor     | Minor   | New        | New     | New      | New         | New        | Estab.    | New      |
| Fort Worth-Arlington, TX                   | Minor   | Minor     | Minor   | New        | Minor   | New      | Minor       | --         | --        | --       |
| Fresno, CA                                 | New     | Minor     | New     | New        | New     | Estab.   | New         | --         | --        | --       |
| Gary, IN                                   | --      | --        | New     | --         | --      | Minor    | --          | --         | --        | --       |
| Grand Rapids-Muskegon, MI <sup>a</sup>     | New     | --        | Minor   | New        | Minor   | Minor    | --          | Minor      | --        | --       |
| Greensboro--Winston-Salem, NC <sup>a</sup> | New     | New       | New     | New        | New     | New      | New         | --         | --        | --       |
| Greenville-Spartanburg, SC <sup>a</sup>    | New     | --        | New     | Minor      | --      | Minor    | --          | --         | --        | --       |
| Harrisburg-Lebanon-Carlisle, PA            | New     | --        | New     | New        | Minor   | Minor    | --          | --         | --        | --       |
| Hartford, CT                               | Minor   | Minor     | New     | New        | New     | Minor    | --          | Minor      | Estab.    | --       |
| Honolulu, HI                               | Estab.  | Estab.    | --      | Estab.     | Estab.  | Minor    | --          | --         | --        | --       |
| Houston, TX                                | Estab.  | Minor     | Estab.  | Estab.     | Minor   | Estab.   | New         | Minor      | Minor     | --       |
| Indianapolis, IN                           | New     | Minor     | Minor   | Minor      | Minor   | New      | --          | --         | --        | --       |
| Jacksonville, FL                           | New     | New       | New     | New        | New     | Minor    | --          | --         | Minor     | New      |
| Jersey City, NJ                            | New     | New       | Estab.  | New        | New     | Minor    | New         | Estab.     | New       | New      |
| Kansas City, MO-KS                         | New     | Minor     | Minor   | New        | Minor   | Minor    | Minor       | --         | --        | --       |
| Knoxville, TN                              | --      | --        | --      | --         | --      | Minor    | --          | --         | --        | --       |
| Las Vegas, NV-AZ                           | New     | New       | New     | New        | New     | New      | New         | --         | --        | --       |
| Little Rock, AR <sup>a</sup>               | --      | --        | --      | --         | --      | Minor    | --          | --         | --        | --       |
| Los Angeles-Long Beach, CA                 | Estab.  | Estab.    | Estab.  | Estab.     | Estab.  | Estab.   | Estab.      | Minor      | Minor     | Minor    |
| Louisville, KY-IN                          | New     | Minor     | New     | New        | New     | Minor    | --          | --         | --        | --       |
| McAllen-Edinburg, TX <sup>a</sup>          | --      | Minor     | --      | --         | --      | Estab.   | --          | --         | --        | --       |
| Memphis, TN-AR-MS                          | New     | Minor     | New     | New        | Minor   | New      | --          | --         | --        | --       |
| Miami, FL                                  | Minor   | Minor     | Minor   | New        | Minor   | New      | Estab.      | New        | Estab.    | Estab.   |
| Middlesex-Somerset, NJ <sup>a</sup>        | New     | New       | New     | New        | New     | Minor    | Minor       | New        | New       | Minor    |
| Milwaukee-Waukesha, WI                     | New     | Minor     | Estab.  | New        | Minor   | Minor    | --          | --         | --        | --       |

*(continued)*

(Table S1, continued)

| Metropolitan Name                          | Chinese | Filipinos | Indians | Vietnamese | Koreans | Mexicans | Salvadorans | Dominicans | Jamaicans | Haitians |
|--------------------------------------------|---------|-----------|---------|------------|---------|----------|-------------|------------|-----------|----------|
| Minneapolis-St. Paul, MN-WI                | Minor   | Minor     | Minor   | Estab.     | Estab.  | New      | New         | --         | --        | --       |
| Mobile, AL                                 | --      | --        | --      | New        | --      | Minor    | --          | --         | --        | --       |
| Monmouth-Ocean, NJ                         | Minor   | Minor     | New     | --         | New     | Minor    | --          | --         | New       | New      |
| Nashville, TN                              | New     | --        | Minor   | New        | Minor   | New      | Minor       | --         | --        | --       |
| Nassau-Suffolk, NY                         | Minor   | Minor     | Estab.  | Minor      | New     | Minor    | Estab.      | New        | Estab.    | New      |
| New Haven-Meriden, CT                      | New     | --        | Estab.  | --         | New     | Minor    | --          | --         | New       | --       |
| New Orleans, LA                            | Minor   | Minor     | Minor   | Estab.     | --      | Minor    | Minor       | --         | --        | --       |
| New York, NY                               | Estab.  | New       | Estab.  | Minor      | Estab.  | New      | New         | Estab.     | Estab.    | Estab.   |
| Newark, NJ                                 | New     | New       | Estab.  | Minor      | New     | Minor    | New         | New        | Estab.    | Estab.   |
| Norfolk-Virginia Beach, VA-NC <sup>a</sup> | Minor   | Estab.    | Minor   | Minor      | New     | Minor    | --          | --         | Minor     | --       |
| Oakland, CA                                | New     | New       | New     | New        | New     | New      | New         | --         | Minor     | --       |
| Oklahoma City, OK                          | New     | Minor     | Estab.  | Estab.     | Minor   | New      | --          | --         | --        | --       |
| Omaha, NE-IA                               | Minor   | Minor     | Minor   | Minor      | New     | Minor    | Minor       | --         | --        | --       |
| Orange County, CA                          | New     | New       | New     | New        | New     | New      | New         | --         | --        | --       |
| Orlando, FL                                | New     | Minor     | New     | New        | New     | New      | Minor       | New        | New       | New      |
| Philadelphia, PA-NJ                        | Minor   | Minor     | Estab.  | Minor      | Estab.  | Minor    | Minor       | Minor      | New       | Minor    |
| Phoenix-Mesa, AZ                           | Minor   | Minor     | Minor   | New        | Minor   | Estab.   | New         | --         | --        | --       |
| Pittsburgh, PA                             | Minor   | Minor     | Estab.  | New        | Minor   | Minor    | --          | --         | --        | --       |
| Portland-Vancouver, OR-WA                  | New     | Minor     | New     | Estab.     | Estab.  | New      | Minor       | --         | --        | --       |
| Providence-Fall River, RI-MA <sup>a</sup>  | New     | New       | New     | --         | New     | Minor    | Minor       | New        | --        | New      |
| Raleigh-Durham-Chapel Hill, NC             | New     | Minor     | New     | Minor      | Minor   | New      | New         | --         | --        | --       |
| Richmond-Petersburg, VA                    | Minor   | Minor     | Minor   | New        | Minor   | New      | New         | --         | --        | --       |
| Riverside-San Bernardino, CA               | Minor   | New       | Minor   | New        | New     | Estab.   | New         | --         | New       | --       |
| Rochester, NY                              | New     | --        | Minor   | Minor      | Minor   | Minor    | --          | Minor      | New       | --       |
| Sacramento, CA                             | Estab.  | New       | New     | Estab.     | New     | New      | Minor       | --         | --        | --       |
| St. Louis, MO-IL                           | Minor   | Minor     | Minor   | New        | Minor   | New      | --          | --         | --        | --       |
| Salt Lake City-Ogden, UT                   | New     | Minor     | Minor   | New        | Minor   | New      | Minor       | --         | --        | --       |
| San Antonio, TX                            | Minor   | Minor     | Minor   | Minor      | New     | Estab.   | Minor       | --         | --        | --       |
| San Diego, CA                              | New     | Estab.    | Minor   | Estab.     | New     | Estab.   | Minor       | --         | --        | --       |
| San Francisco, CA                          | Estab.  | Estab.    | Estab.  | Estab.     | Estab.  | Estab.   | Estab.      | --         | --        | --       |
| San Jose, CA                               | Estab.  | Estab.    | Estab.  | Estab.     | Estab.  | Estab.   | New         | --         | --        | --       |
| Sarasota-Bradenton, FL                     | --      | Minor     | --      | --         | --      | New      | --          | --         | --        | New      |
| Scranton--Wilkes-Barre, PA <sup>a</sup>    | Estab.  | Estab.    | Estab.  | Estab.     | Estab.  | New      | New         | --         | --        | --       |
| Seattle-Bellevue-Everett, WA               | New     | --        | New     | New        | --      | --       | --          | --         | New       | --       |
| Springfield, MA                            | New     | Estab.    | New     | New        | --      | New      | --          | --         | --        | --       |
| Stockton-Lodi, CA                          | Minor   | --        | Minor   | New        | Minor   | --       | --          | --         | --        | --       |
| Syracuse, NY                               | Minor   | New       | --      | New        | Estab.  | Minor    | --          | --         | --        | --       |
| Tacoma, WA                                 | Minor   | Minor     | New     | New        | New     | New      | New         | Minor      | New       | New      |
| Tampa-St. Petersburg, FL <sup>a</sup>      | Minor   | --        | New     | --         | --      | Minor    | --          | --         | --        | --       |
| Toledo, OH                                 | New     | Minor     | New     | New        | Minor   | Estab.   | --          | --         | --        | --       |
| Tucson, AZ                                 | --      | --        | Minor   | Minor      | --      | Minor    | --          | --         | --        | --       |
| Tulsa, OK                                  | New     | Estab.    | New     | Minor      | --      | New      | New         | --         | --        | --       |
| Vallejo-Fairfield-Napa, CA                 | Minor   | Estab.    | New     | New        | New     | Estab.   | New         | --         | --        | --       |
| Ventura, CA                                | Estab.  | Estab.    | Estab.  | Estab.     | Estab.  | New      | Estab.      | Minor      | Estab.    | Minor    |
| Washington, DC-MD-VA-WV                    | Minor   | Minor     | Minor   | Minor      | --      | New      | Minor       | New        | New       | New      |
| West Palm Beach, FL <sup>a</sup>           | --      | --        | --      | Estab.     | --      | Minor    | --          | --         | --        | --       |
| Wichita, KS                                | New     | --        | New     | --         | New     | New      | --          | --         | New       | --       |
| Wilmington-Newark, DE-MD                   | --      | --        | --      | --         | --      | --       | --          | --         | --        | --       |
| Youngstown-Warren, OH                      | --      | --        | --      | --         | --      | --       | --          | --         | --        | --       |

<sup>a</sup>Metropolitan area name was shortened for presentation.

**Table S2** Dissimilarity of new immigrant groups from white natives, by destination type, 2005–2009

|             | Unweighted  |     |       | Weighted    |     |       |
|-------------|-------------|-----|-------|-------------|-----|-------|
|             | Established | New | Minor | Established | New | Minor |
| Chinese     | .59         | .63 | .64   | .63         | .57 | .62   |
| Filipinos   | .58         | .57 | .65   | .59         | .53 | .63   |
| Indians     | .61         | .66 | .70   | .59         | .61 | .69   |
| Vietnamese  | .67         | .73 | .77   | .66         | .68 | .77   |
| Koreans     | .58         | .67 | .70   | .61         | .62 | .68   |
| Mexicans    | .58         | .62 | .71   | .61         | .62 | .70   |
| Salvadorans | .69         | .74 | .81   | .70         | .71 | .71   |
| Dominicans  | .70         | .71 | .86   | .81         | .70 | .84   |
| Jamaicans   | .77         | .73 | .85   | .78         | .67 | .85   |
| Haitians    | .84         | .78 | .85   | .83         | .70 | .82   |

*Notes:* Includes only MSAs with at least 1,000 immigrant group members. Weighted means are weighted by group metropolitan area population.

**Table S3** Descriptive statistics and correlations for variables in analysis

|                                      | All   | Estab | New   | Minor | (1)         | (2)         | (3)         | (4)         | (5)         | (6)         | (7)        | (8)         | (9)         | (10)        | (11)        | (12)        | (13)        | (14)        | (15)        | (16)        | (17)        | (18)        | (19)        | (20)        | (21)        | (22)        | (23)        | (24)        | (25)        | (26) |  |
|--------------------------------------|-------|-------|-------|-------|-------------|-------------|-------------|-------------|-------------|-------------|------------|-------------|-------------|-------------|-------------|-------------|-------------|-------------|-------------|-------------|-------------|-------------|-------------|-------------|-------------|-------------|-------------|-------------|-------------|------|--|
| (1) D from native whites             | 65.58 | 62.37 | 65.27 | 67.43 | 1.00        |             |             |             |             |             |            |             |             |             |             |             |             |             |             |             |             |             |             |             |             |             |             |             |             |      |  |
| (2) Established                      | .18   | 1.00  | .00   | .00   | <b>-.15</b> | 1.00        |             |             |             |             |            |             |             |             |             |             |             |             |             |             |             |             |             |             |             |             |             |             |             |      |  |
| (3) New                              | .44   | .00   | 1.00  | .00   | -.03        | <b>-.41</b> | 1.00        |             |             |             |            |             |             |             |             |             |             |             |             |             |             |             |             |             |             |             |             |             |             |      |  |
| (4) Minor                            | .38   | .00   | .00   | 1.00  | <b>.14</b>  | <b>-.37</b> | <b>-.70</b> | 1.00        |             |             |            |             |             |             |             |             |             |             |             |             |             |             |             |             |             |             |             |             |             |      |  |
| (5) Group size (in 10,000s)          | 2.30  | 8.30  | 1.49  | .43   | -.01        | <b>.35</b>  | <b>-.09</b> | <b>-.18</b> | 1.00        |             |            |             |             |             |             |             |             |             |             |             |             |             |             |             |             |             |             |             |             |      |  |
| (6) Recent arrivals                  | 26.48 | 21.70 | 27.29 | 27.77 | .04         | <b>-.18</b> | .06         | <b>.08</b>  | -.05        | 1.00        |            |             |             |             |             |             |             |             |             |             |             |             |             |             |             |             |             |             |             |      |  |
| (7) English ability                  | 74.91 | 75.16 | 71.86 | 78.26 | <b>-.23</b> | .01         | <b>-.15</b> | <b>.15</b>  | <b>-.20</b> | <b>-.28</b> | 1.00       |             |             |             |             |             |             |             |             |             |             |             |             |             |             |             |             |             |             |      |  |
| (8) White income parity <sup>a</sup> | 81.63 | 76.28 | 80.27 | 85.67 | <b>-.31</b> | <b>-.10</b> | -.05        | <b>.13</b>  | <b>-.20</b> | .02         | <b>.67</b> | 1.00        |             |             |             |             |             |             |             |             |             |             |             |             |             |             |             |             |             |      |  |
| (9) Homeowners <sup>a</sup>          | 48.39 | 49.55 | 47.78 | 48.55 | <b>-.35</b> | .04         | -.04        | .01         | -.05        | <b>-.47</b> | <b>.34</b> | <b>.44</b>  | 1.00        |             |             |             |             |             |             |             |             |             |             |             |             |             |             |             |             |      |  |
| (10) Northeast                       | .24   | .23   | .27   | .22   | <b>.17</b>  | -.02        | .06         | -.05        | -.04        | .01         | .05        | .00         | <b>-.22</b> | 1.00        |             |             |             |             |             |             |             |             |             |             |             |             |             |             |             |      |  |
| (11) Midwest                         | .16   | .11   | .10   | .25   | <b>.17</b>  | -.07        | <b>-.14</b> | <b>.19</b>  | -.05        | <b>.15</b>  | .05        | <b>.14</b>  | .01         | <b>-.25</b> | 1.00        |             |             |             |             |             |             |             |             |             |             |             |             |             |             |      |  |
| (12) West                            | .24   | .41   | .27   | .13   | <b>-.25</b> | <b>.18</b>  | .06         | <b>-.20</b> | <b>.17</b>  | <b>-.24</b> | -.05       | -.05        | <b>.14</b>  | <b>-.32</b> | <b>-.25</b> | 1.00        |             |             |             |             |             |             |             |             |             |             |             |             |             |      |  |
| (13) South                           | .35   | .25   | .35   | .40   | -.06        | <b>-.10</b> | .00         | <b>.08</b>  | -.07        | <b>.10</b>  | -.04       | -.06        | <b>-.42</b> | <b>-.32</b> | <b>-.42</b> | 1.00        |             |             |             |             |             |             |             |             |             |             |             |             |             |      |  |
| (14) Total population (ln)           | 14.28 | 14.70 | 14.12 | 14.27 | <b>.18</b>  | <b>.28</b>  | -.01        | -.01        | <b>.30</b>  | <b>-.20</b> | .01        | <b>-.13</b> | .01         | -.05        | .06         | .03         | -.03        | 1.00        |             |             |             |             |             |             |             |             |             |             |             |      |  |
| (15) Percent immigrant               | 13.48 | 20.66 | 13.46 | 10.18 | <b>-.15</b> | <b>.32</b>  | .00         | <b>-.25</b> | <b>.28</b>  | <b>-.33</b> | -.04       | <b>-.23</b> | -.03        | .06         | <b>-.31</b> | <b>.33</b>  | <b>-.11</b> | <b>.31</b>  | 1.00        |             |             |             |             |             |             |             |             |             |             |      |  |
| (16) New immigrant groups            | 7.22  | 7.97  | 7.18  | 6.92  | <b>.09</b>  | <b>.17</b>  | -.02        | <b>-.12</b> | <b>.16</b>  | <b>-.28</b> | .01        | <b>-.18</b> | .02         | <b>.20</b>  | <b>-.20</b> | <b>-.10</b> | .06         | <b>.67</b>  | <b>.50</b>  | 1.00        |             |             |             |             |             |             |             |             |             |      |  |
| (17) Major immigrant gateway         | .08   | .23   | .03   | .07   | <b>.12</b>  | <b>.25</b>  | <b>-.16</b> | -.03        | <b>.32</b>  | <b>-.17</b> | -.01       | <b>-.17</b> | <b>-.08</b> | -.03        | .04         | -.03        | .02         | <b>.54</b>  | <b>.53</b>  | <b>.37</b>  | 1.00        |             |             |             |             |             |             |             |             |      |  |
| (18) Percentage black                | 12.93 | 11.80 | 12.40 | 14.06 | <b>.12</b>  | -.06        | -.05        | <b>.10</b>  | -.04        | <b>.10</b>  | .00        | -.04        | -.03        | <b>-.15</b> | .03         | <b>-.50</b> | <b>.56</b>  | <b>.18</b>  | <b>-.19</b> | <b>.14</b>  | <b>.15</b>  | 1.00        |             |             |             |             |             |             |             |      |  |
| (19) Percentage elderly              | 11.96 | 11.27 | 12.10 | 12.12 | <b>.13</b>  | <b>-.11</b> | .04         | .04         | <b>-.12</b> | -.02        | .05        | .07         | .01         | <b>.32</b>  | -.05        | <b>-.23</b> | -.04        | <b>-.17</b> | -.06        | .01         | <b>-.13</b> | <b>-.13</b> | 1.00        |             |             |             |             |             |             |      |  |
| (20) Suburbanization                 | 65.74 | 60.00 | 68.42 | 65.36 | .02         | <b>-.13</b> | <b>.12</b>  | -.02        | <b>-.13</b> | .02         | .04        | .06         | <b>.13</b>  | <b>.26</b>  | -.05        | <b>-.14</b> | -.07        | -.01        | -.07        | <b>.20</b>  | <b>-.22</b> | -.01        | <b>.31</b>  | 1.00        |             |             |             |             |             |      |  |
| (21) Vacancy rate                    | 6.73  | 5.68  | 6.85  | 7.09  | -.01        | <b>-.18</b> | .04         | <b>.10</b>  | <b>-.09</b> | .03         | .02        | <b>.08</b>  | <b>.16</b>  | <b>-.15</b> | <b>-.13</b> | <b>-.15</b> | <b>.37</b>  | <b>-.19</b> | <b>-.17</b> | <b>-.18</b> | -.07        | .08         | <b>.56</b>  | <b>.09</b>  | 1.00        |             |             |             |             |      |  |
| (22) New construction                | 16.94 | 13.60 | 18.31 | 16.92 | <b>-.20</b> | <b>-.20</b> | <b>.16</b>  | .00         | <b>-.09</b> | <b>.11</b>  | -.06       | .04         | <b>.18</b>  | <b>-.57</b> | <b>-.09</b> | <b>.13</b>  | <b>.47</b>  | <b>-.15</b> | <b>-.23</b> | <b>-.16</b> | <b>-.20</b> | <b>.08</b>  | <b>-.27</b> | -.06        | <b>.35</b>  | 1.00        |             |             |             |      |  |
| (23) Science and technology          | 6.19  | 7.25  | 5.99  | 5.93  | <b>-.08</b> | .21         | -.08        | -.09        | .02         | .05         | .03        | -.07        | <b>-.10</b> | .06         | -.03        | <b>.12</b>  | <b>-.14</b> | <b>.18</b>  | <b>.09</b>  | <b>.17</b>  | <b>-.13</b> | <b>-.09</b> | <b>-.30</b> | .06         | <b>-.51</b> | <b>-.09</b> | 1.00        |             |             |      |  |
| (24) Low-skill service               | 10.60 | 10.52 | 10.73 | 10.50 | <b>-.09</b> | -.02        | .06         | -.04        | .03         | -.15        | .02        | .04         | <b>.10</b>  | <b>-.26</b> | <b>-.08</b> | <b>.29</b>  | .04         | <b>-.10</b> | <b>.09</b>  | <b>-.14</b> | .04         | <b>-.12</b> | <b>.22</b>  | <b>-.14</b> | <b>.48</b>  | <b>.39</b>  | <b>-.48</b> | 1.00        |             |      |  |
| (25) Manufacturing                   | 12.78 | 11.55 | 12.92 | 13.19 | <b>.16</b>  | -.19        | .04         | .11         | -.03        | .16         | -.03       | .19         | -.05        | -.02        | <b>.38</b>  | <b>-.16</b> | <b>-.13</b> | <b>-.25</b> | <b>-.25</b> | <b>-.37</b> | .01         | .00         | -.07        | <b>-.11</b> | -.07        | <b>-.09</b> | <b>-.39</b> | <b>-.11</b> | 1.00        |      |  |
| (26) Military                        | .78   | 1.07  | .58   | .88   | <b>-.15</b> | <b>.08</b>  | <b>-.11</b> | .04         | -.02        | <b>-.14</b> | .04        | -.02        | .07         | <b>-.21</b> | <b>-.11</b> | <b>.16</b>  | <b>.13</b>  | <b>-.12</b> | <b>-.09</b> | <b>-.16</b> | <b>-.11</b> | <b>.10</b>  | <b>-.10</b> | <b>-.30</b> | .04         | <b>.09</b>  | <b>-.08</b> | <b>.25</b>  | <b>-.17</b> | 1.00 |  |

Notes: N = 622 (number of metropolitan areas = 98); only includes MSAs with at least 1,000 group members. Bold values indicate that Pearson's *r* is statistically significant at  $p < .05$  (two-tailed *t* test).

<sup>a</sup>Refers to characteristics of foreign- and native-born members of ethnic origin group.
